# Supplementary material for: An Arabidopsis flavonoid transporter is required for anther dehiscence and pollen development
Source: PubMed Central journal article supplement — J Exp Bot. 2009 Dec 8;61(2):439–51. doi: 10.1093/jxb/erp312 (PMC2803208; doi:10.1093/jxb/erp312), 2009-12-08
Supplement: erp312_1.pdf [file erp312_1.pdf]

# An *Arabidopsis* flavonoid transporter is required for anther dehiscence and pollen development

Elinor P. Thompson, Christopher Wilkins, Vadim Demidchik<sup>1</sup>, Julia M. Davies and Beverley J. Glover\*

## Supplementary information

### Alignment of FFT and related sequences

```
FFT          LLTHGGVEEDYAPARSWTDVVKRVLSTESAKLWMIAPVGFNIIICOYGVSSVTNIFVGH I 66
SlAnthPerm  ERNDLIGADGDYRPAKSTKDWAIFCVETLKLWRIGGPIAFNIIICOYGVNSLTNIFVGH L 73
At4g00350   TLLGETTGADFPPIQSFRAKLVCVVETS KLWEIAAPIAFNILCNYGVNSFTSIFVGH I 120
OsXP        -----MFIGHL 6
At3g26590   RSDLPFLSVDDIPPITTVGGFVREFNVETKKLWYLAGPAIFTSVNQYSLGAITQVFAGH I 77
At5g38030   PPALPFSSVEDIPPIITTVGGFVKEFNVEVKKLWYLAGPAIFMSITQYSLGAATQVFAGH I 77
At1g47530   PELTGTKSASKV-----WAKEFGEE SKRLWELAGPAIFTAISQYSLGALTQTFSGRL 67
Q96FL8      PAPVRGGPEATLEVRGSRCLRLSAFREE LRALLVLAGPAFLVQLMVFLISFISVFCGHL 66
                                                    * *::
```

```
FFT          GEVELSAVVISLSVIGTFSFGFLLGMGSALETLCGQAYGAGQVNMLGVYMQRSWIIILFVS 126
SlAnthPerm  GNVELSAISIAQTVISTFSFGFMMGMGSALETLCGQAYGAGQVHMLGVYMQRSIIILLAT 133
At4g00350   GDLELSAVAIASVVSNFSGFLLGMASALETLCGQAFAGQMDMLGVYMQRSWIIILLGT 180
OsXP        GNLPAAASVGLSVFATFALGFLGMGSALETLCGQAFAGQVSMGLGVYLRQSWIILLGA 66
At3g26590   STIALAAVSVENSVVAGFSFGIMLGMGSALETLCGQAFAGKLSMLGVYLRQSWIILNVT 137
At5g38030   STIALAAVSVENSVIAGFSFGVMLGMGSALETLCGQAFAGKLSMLGVYLRQSWIILNVT 137
At1g47530   GELELAAVSVENSVISGLAFGVMLGMGSALETLCGQAYGAGQIRMMGIYMQRSWIIILFTT 127
Q96FL8      GKLELDAVTLAIAVINVTGVSVGFGLSSACDTLISQTYGSQNLKHVGVIIQRSAVLVLLC 126
. : * * : : : * . . . . : * : * * : * * . * : * : : : : * : * * * : *
```

```
FFT          CFFLLPIYIFATPVLRLLLQAAEIAVPAGQFTLLTIPQLFSLAFNFPTS KFLQAQSKVVA 186
SlAnthPerm  CVFLLPIYLFSTPLLVLVLLQETAADLSGRYTMLLIPQLFSLAINFPTS KFLQAQSKVDV 193
At4g00350   SVCLLPLYIYATPLLILLQPEIAEISGKFTTQIIPQMFALAINFPTQKFLQSQSKVGI 240
OsXP        TVLMVPVYVLAELPLLLLVGQDPEVARAAGRFTLYILPGAFAFAVNFPSGKFLQAQSKVGV 126
At3g26590   ALILSLLYIFAAPILASIGQTAASSAAGIFSIYMIPIQIFAYAINFPTAKFLQSQSKIMV 197
At5g38030   AVILSLLYIFAAPILAFIQTPAISATGIFSIYMIPIQIFAYAVNYPTAKFLQSQSKIMV 197
At1g47530   ALFLLPVYIWAPPILSFFGEAPHISKAAGK FALWMI PQLFAYAANFPIQKFLQSQRKVLV 187
Q96FL8      CFPWCWALFLNTQHILLFRQDPDVSRLLTQTYVTIFIPALPATFLYMLQVKYLLNQGIVLP 186
. : : : : * . : : : : * : : : : * * * : *
```

```
FFT          IAWIGFVALSLHVIMLWLFIEFGWGTNGAALAFNITNWGTAIQIIVYVIG-WCNEG-WT 244
SlAnthPerm  LAGIGFAAVLVHALLFLWLFYITLEWGTNGAIAFDLTNWLTAMAYVVG-WCKDG-WK 251
At4g00350   MAWIGFFALTLHFILYLFINVKWGLNGAAAAFVSAWAGIAIQVVYVVG-WCKDG-WK 298
OsXP        LAWIGVAGLAFHVIGITLAVSVLWGLPGAAAYDVSQWASSLAQVAYIMG-WCREG-WR 184
At3g26590   MAVISAVALVIHVPLTWVFVVKLQWGMPLAVVNLASWCFIDMAQLVYIFSGTCGEA-WS 256
At5g38030   MAISAVALVLHVLLTWVIEGLQWGTAGLAVVNLASWVFI VVAQLVYIFSGTCGEA-WS 256
At1g47530   MAWISGVVLVIHAVFSWLFILYFKWGLVGAAITLNTS WNLVIVGQLLYILITKSDGA-WT 246
Q96FL8      QIVTGVAANLVNALANYLFLHQHLGLHIGSALANLISQYTLALLFLYILGKKLHQATWG 246
. : : : : * * * * : : : : * * . *
```

```
FFT          GLSWLAFKEIWAFFVRLSIAAVMLCLEIWMMSIIVLTGRLDNAVIAVDSL SICMNINGL 304
SlAnthPerm  GLSWSAFNEIWAFFVRLSIAAVMLCLEIWMMSIILLVGH LNNAVI AVGSI SICMNINGW 311
At4g00350   GLSWLAFQDVWPFKLSFASAVMLCLEIWFMTIIVLTGHLEDPVIAVGSLSICMNINGW 358
OsXP        GWSMAAFHDLAAFLRLSIESAVMLCLEIWIYGLITVLTGDLDDAQMADVSLGICMNINGY 244
At3g26590   GFSWEAFHNLWSFVRLSLSASAVMLCLEVWYFMAIILFAGYLKNAEISVAALSICMNILGW 316
At5g38030   GFSWEAFHNLWSFVRLSLSASAVMLCLEVWYLMVAVILFAGYLKNAEISVAALSICMNILGW 316
At1g47530   GFSMLAFRDLYGFVKLSLASALMLCLEFWYLMVAVVVTGLLPNPLIPVD AISICMNI EW 306
Q96FL8      GWSLECLQD WASFLRLAIP SMLMLCMEWWAYE VGSF LSGILG--MV ELGAQSIVYELAI I 304
* * . : : * : * * * * * . . * * : : : * : *
```

```
FFT          EAMLFIGINA AISVRVSNELGLRPRAAKYSVYVTVFQSL LIGLVFMVAII IARDHF AII 364
SlAnthPerm  ESMFIGINA AISIRVSNELGQGHPRATKYSVYITV FQSL LIGL ICMVIVLVAR D H LAI I 371
At4g00350   EGMFIGINA AISVRVSNELGSGHPRAAKYSVIVTVIESLVIGVVC AIVLITR DDFAVI 418
OsXP        EGMFIGINA AISVRVSNELGSGRPRAAHAMAVVVVAESLLIGL ICMALV LAFSDK LALV 304
At3g26590   TAMIAIGMNTAVSVRVSNELGANHPRTAKFSLLVAVITSTLIGFIVSMILLIFRDQYPSL 376
At5g38030   TAMIAIGMNAAVSVRVSNELGAKHPRTAKFSLLVAVITSTVIGLAISIALLIFRDKYPSL 376
```



## RTPCR

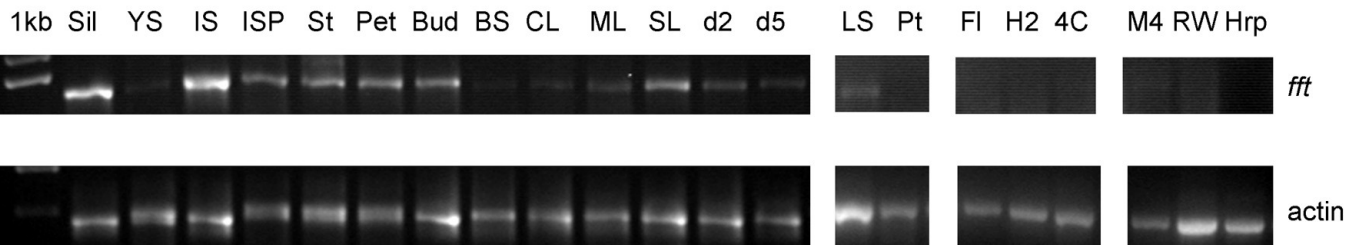

Supp.2. Tissue or stress-induced transcription of FFT-1. RTPCR conducted according to Materials and methods. Sil, Silique (green, >1cm); YS, young silique (green, <0.5cm); IS, immature silique (green, <1cm); ISP, IS with senescing petals attached; Pet, petals; Bud, unopened bud; BS, bolt stem; CL, cauline leaf; ML, mature rosette leaf; SL, senescent anthocyanin-pigmented leaf; d2/d5, day2 or d5 seedling; LS, rosette leaf of plant grown with 1% sucrose; Pt, petioles; Fl, plates flooded 25ml sterile water 36h; H2, 1mM H<sub>2</sub>O<sub>2</sub> added to root tips 3h; 4C, plates incubated 4°C with light for 24h; *P. syringae* infiltrated into leaf as follows: M4, *P.s. maculicola* M4 (pathogenic), RW, *P.s. phaseolica* RW60 (nonpathogenic), Hrp, *P.s. DC300 HrpA-* (nonpathogenic).

***fft-1* mutant: Southern and position of T-DNA insertion**

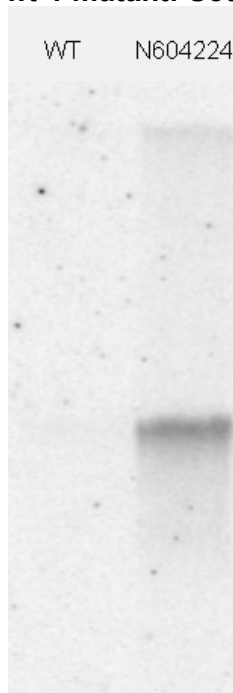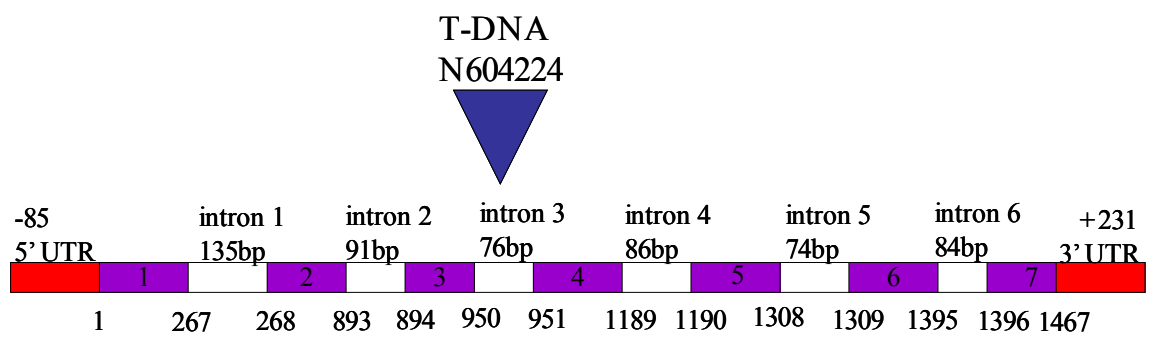

Supp.3. Southern blot with kanamycin probe showing one T-DNA band in genomic DNA from *fft-1* (N604224) mutant and position of T-DNA insertion.

## Complemented mutant

RT-PCR for null mutant

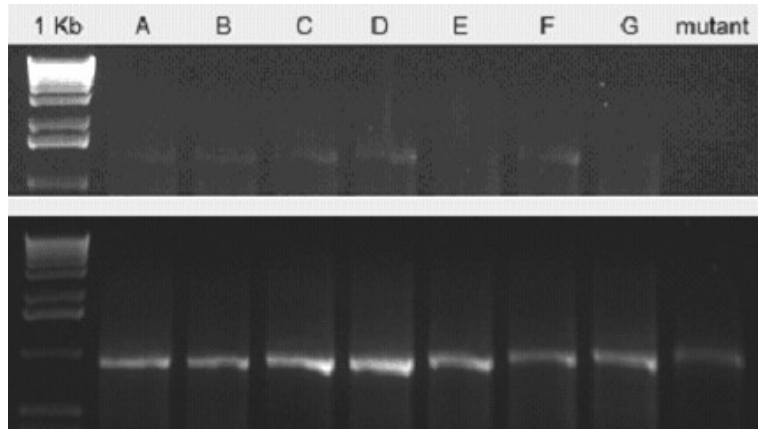

Supp.4. RT-PCR in inflorescence tissues (top panel, FFT transcript; lower panel, actin8). From seven transformed mutants (lines A–G), lines D, F and G were investigated fully.

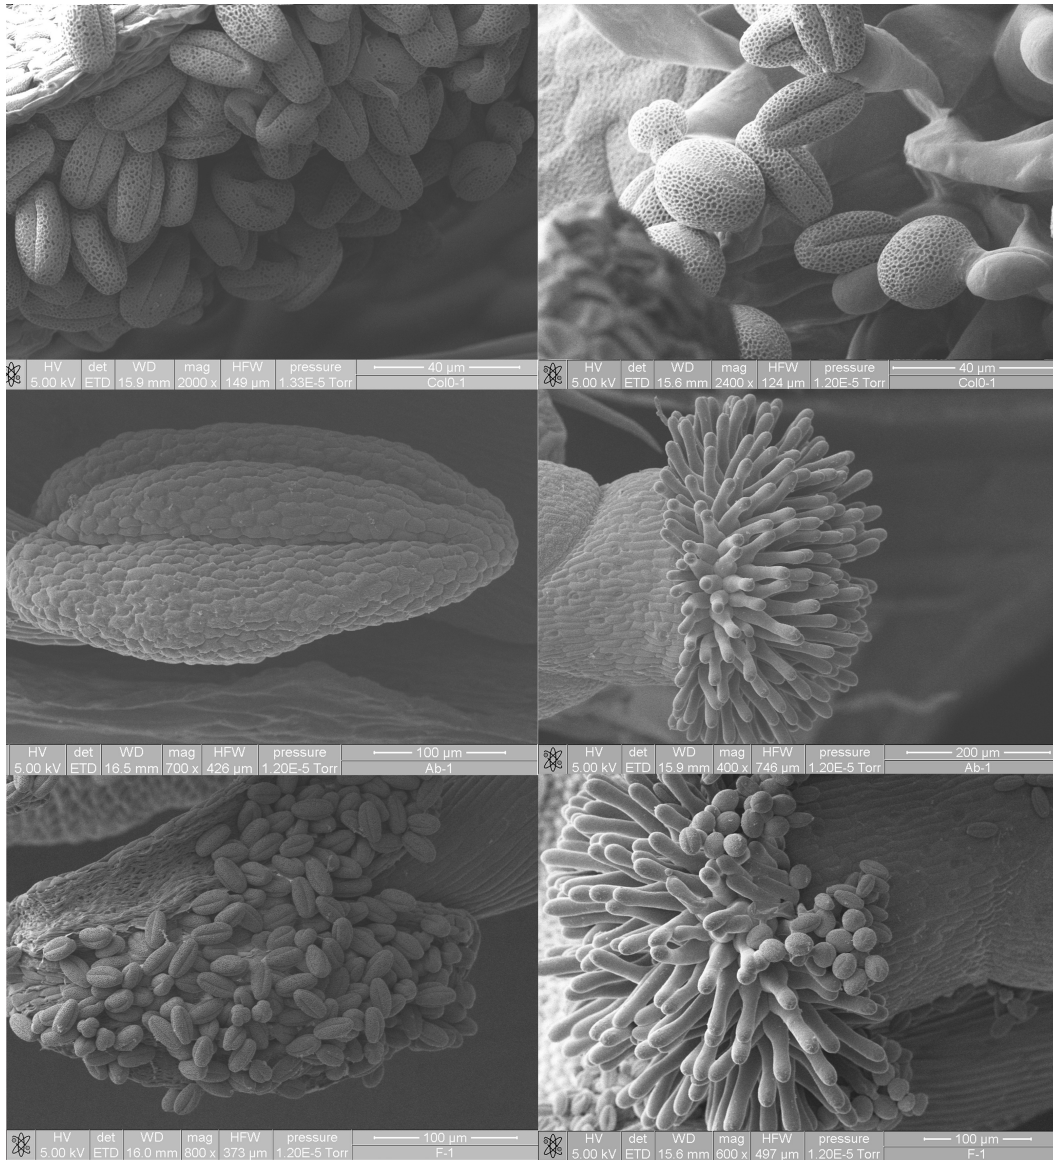

Supp.5. Cryo-SEM of inflorescence tissue from WT (top panel, Col0-1), *ftt-1* mutant (middle panel; Ab-1) and complemented mutant (lower panel, F-1). Mutant has non-dehiscent anthers but receptive papillae on the stigma, whereas WT and complemented mutant have dehiscent anthers and pollen germinating on stigma papillae.

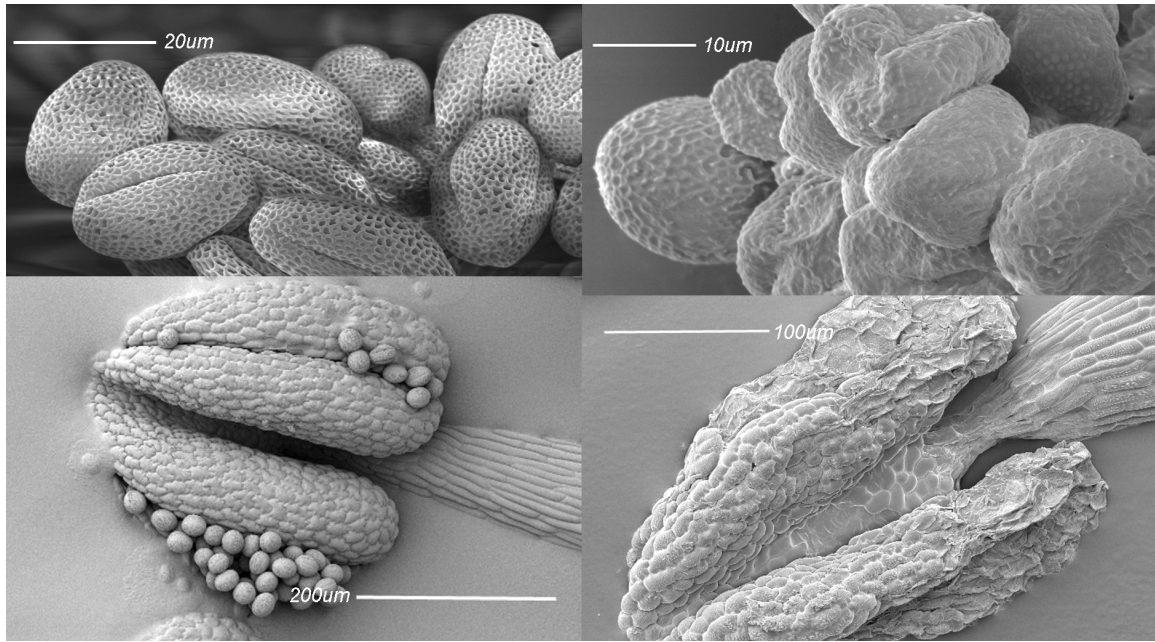

Col0

*fft-1*

Supp.6. SEM of WT (Col0) and *fft-1* mutant pollen and anthers, showing how a proportion of pollen and anthers are defective in the mutant.

Supp.7. Photosynthetic parameters. Since flavonoids may help to protect plants from u.v. light, it seemed prudent to ensure that the mutant plants were not suffering from a generalised inability to thrive, unlikely though this seemed from their appearance and increased rates of root growth. Basic photosynthetic parameters were checked, namely,  $F_v/F_m$  and chlorophyll content ( $a$ ,  $b$  and  $a:b$ ), to ensure no difference in photosynthetic efficiency between WT and mutant, and we also determined that there was no effect of different light intensities (10–250  $\mu\text{mol}/\text{m}^2/\text{s}$ ) on the pollen phenotypes.



(a)

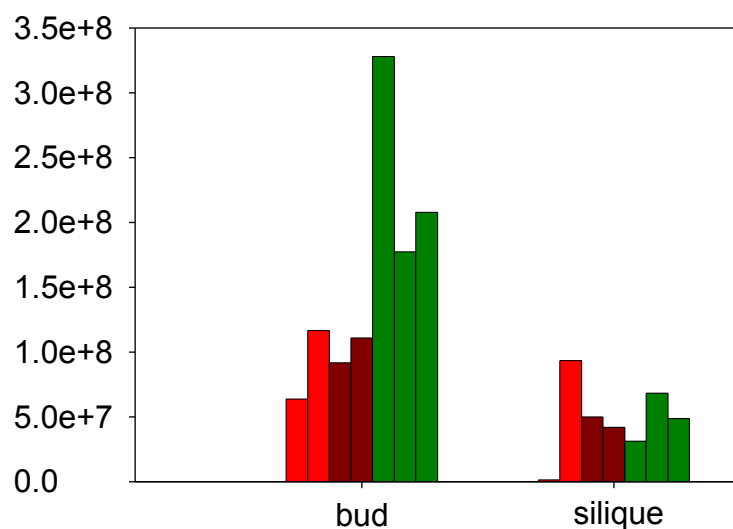

(b)

| Compound and sample | Col0 mean $\pm$ SEM                    | <i>fft-1</i> mutant mean $\pm$ SEM    | <i>P</i> * |
|---------------------|----------------------------------------|---------------------------------------|------------|
| kGG bud             | $273 \times 10^3 \pm 67 \times 10^3$   | $141 \times 10^3 \pm 29 \times 10^3$  | 0.018      |
| RkG bud             | $869 \times 10^3 \pm 225 \times 10^3$  | $535 \times 10^3 \pm 85 \times 10^3$  | 0.18       |
| RkG IS              | $1070 \times 10^3 \pm 564 \times 10^3$ | $796 \times 10^3 \pm 389 \times 10^3$ | 0.48       |
| qRGR bud            | $217 \times 10^3 \pm 104 \times 10^3$  | $339 \times 10^3 \pm 102 \times 10^3$ | 0.19       |
| qRG bud             | $690 \times 10^3 \pm 285 \times 10^3$  | $428 \times 10^3 \pm 113 \times 10^3$ | 0.13       |
| qRG IS              | $515 \times 10^3 \pm 303 \times 10^3$  | $189 \times 10^3 \pm 67 \times 10^3$  | 0.23       |

\*5 d.f.

Supp.8. (a) Example of LCMS runs for kGG in buds and immature siliques. Mutant, left (red); wild-type, right (cross-hatched, green). (b) Mean values from which Table 1 proportions are derived. k, Kaempferol; R, rhamnoside; G, glucoside; IS, immature silique; q, quercetin.
